# Supplementary material for: Powerful and robust non-parametric association testing for microbiome data via a zero-inflated quantile approach (ZINQ)
Source: PubMed Central journal article supplement (PMC8414689; doi:10.1186/s40168-021-01129-3), 2021-09-02
Supplement: 40168_2021_1129_MOESM1_ESM.pdf [file 40168_2021_1129_MOESM1_ESM.pdf]

## Supplementary Material

### Powerful and robust non-parametric association testing for microbiome data via a zero-inflated quantile approach (ZINQ)

Wodan Ling, Ni Zhao, Anna M. Plantinga, Lenore J. Launer, Anthony A. Fodor,  
Katie A. Meyer and Michael C. Wu

The supplementary material includes additional tables for simulation studies, a table summarizing computational cost, and a table summarizing models, approaches and normalization methods used in the paper.

Table S1: Type I error control and power on 10000 simulated datasets generated from the edf of *Anaerovorax*'s normalized abundance with sample size 50, under different settings with significance cutoffs 0.05 and 0.01.

| <b>sample size = 50</b> |              |        |                     |                     |                     |
|-------------------------|--------------|--------|---------------------|---------------------|---------------------|
| <i>Rarefaction</i>      |              |        |                     |                     |                     |
| $\alpha$ -level         | Type I error |        | Power               |                     |                     |
|                         | Null         |        | Setting 1           | Setting 2           | Setting 3           |
|                         | 0.05         | 0.01   | 0.05                | 0.05                | 0.05                |
| ZIP                     | 0.7123       | 0.6273 | 0.8359*             | 0.7360*             | 0.6789*             |
| ZINB                    | 0.1749       | 0.0600 | 0.4142*             | 0.2628*             | 0.1874*             |
| linear regression       | 0.0329       | 0.0043 | 0.2632 <sup>+</sup> | 0.1088 <sup>+</sup> | 0.0402 <sup>+</sup> |
| ZINQ-MinP               | 0.0398       | 0.0066 | 0.1965 <sup>+</sup> | 0.0839 <sup>+</sup> | 0.0428 <sup>+</sup> |
| ZINQ-Cauchy             | 0.0392       | 0.0053 | 0.2186 <sup>+</sup> | 0.0888 <sup>+</sup> | 0.0448 <sup>+</sup> |
| <i>TSS</i>              |              |        |                     |                     |                     |
| $\alpha$ -level         | Type I error |        | Power               |                     |                     |
|                         | Null         |        | Setting 1           | Setting 2           | Setting 3           |
|                         | 0.05         | 0.01   | 0.05                | 0.05                | 0.05                |
| ZIB                     | 0.0177       | 0.0032 | 0.0963 <sup>+</sup> | 0.0313 <sup>+</sup> | 0.0119 <sup>+</sup> |
| Tobit                   | 0.0449       | 0.0087 | 0.3154              | 0.1402              | 0.0557              |
| ZIlogN                  | 0.5128       | 0.5079 | 0.9467*             | 0.9328*             | 0.9174*             |
| ZIG                     | 0.0254       | 0.0023 | 0.1848 <sup>+</sup> | 0.0795 <sup>+</sup> | 0.0318 <sup>+</sup> |
| linear regression       | 0.0332       | 0.0040 | 0.2559 <sup>+</sup> | 0.1070 <sup>+</sup> | 0.0403 <sup>+</sup> |
| ZINQ-MinP               | 0.0328       | 0.0038 | 0.1896 <sup>+</sup> | 0.0781 <sup>+</sup> | 0.0367 <sup>+</sup> |
| ZINQ-Cauchy             | 0.0363       | 0.0065 | 0.2412 <sup>+</sup> | 0.0954 <sup>+</sup> | 0.0408 <sup>+</sup> |
| <i>CSS</i>              |              |        |                     |                     |                     |
| $\alpha$ -level         | Type I error |        | Power               |                     |                     |
|                         | Null         |        | Setting 1           | Setting 2           | Setting 3           |
|                         | 0.05         | 0.01   | 0.05                | 0.05                | 0.05                |
| Tobit                   | 0.0570       | 0.0153 | 0.3331              | 0.1543              | 0.0626              |
| ZIlogN                  | 0.0292       | 0.0047 | 0.2630 <sup>+</sup> | 0.0956 <sup>+</sup> | 0.0384 <sup>+</sup> |
| ZIG                     | 0.0268       | 0.0037 | 0.2356 <sup>+</sup> | 0.0864 <sup>+</sup> | 0.0341 <sup>+</sup> |
| linear regression       | 0.0479       | 0.0119 | 0.3328              | 0.1445              | 0.0542              |
| ZINQ-MinP               | 0.0327       | 0.0041 | 0.1641 <sup>+</sup> | 0.0731 <sup>+</sup> | 0.0380 <sup>+</sup> |
| ZINQ-Cauchy             | 0.0363       | 0.0065 | 0.2096 <sup>+</sup> | 0.0865 <sup>+</sup> | 0.0405 <sup>+</sup> |

Setting 1: 100% from HBP edf for HBP samples;

Setting 2: 80% from HBP edf and 20% from non-HBP edf for HBP samples;

Setting 3: 60% from HBP edf and 40% from non-HBP edf for HBP samples.

\*: power of a method that inflates type I error

<sup>+</sup>: power of a method that deflates type I error

Table S2: Type I error control and power on 10000 simulated datasets generated from the edf of *Anaerovorax*'s normalized abundance with sample size 100, under different settings with significance cutoffs 0.05 and 0.01.

| <b>sample size = 100</b> |              |        |                     |                     |                     |
|--------------------------|--------------|--------|---------------------|---------------------|---------------------|
| <i>Rarefaction</i>       |              |        |                     |                     |                     |
| $\alpha$ -level          | Type I error |        | Power               |                     |                     |
|                          | Null         |        | Setting 1           | Setting 2           | Setting 3           |
|                          | 0.05         | 0.01   | 0.05                | 0.05                | 0.05                |
| ZIP                      | 0.7222       | 0.6428 | 0.9314*             | 0.8115*             | 0.7031*             |
| ZINB                     | 0.1862       | 0.0661 | 0.5969*             | 0.3538*             | 0.2067*             |
| linear regression        | 0.0367       | 0.0044 | 0.4916 <sup>+</sup> | 0.1927 <sup>+</sup> | 0.0486 <sup>+</sup> |
| ZINQ-MinP                | 0.0465       | 0.0075 | 0.4552              | 0.1748              | 0.0590              |
| ZINQ-Cauchy              | 0.0474       | 0.0076 | 0.5063              | 0.1880              | 0.0622              |
| <i>TSS</i>               |              |        |                     |                     |                     |
| $\alpha$ -level          | Type I error |        | Power               |                     |                     |
|                          | Null         |        | Setting 1           | Setting 2           | Setting 3           |
|                          | 0.05         | 0.01   | 0.05                | 0.05                | 0.05                |
| ZIB                      | 0.0151       | 0.0020 | 0.2274 <sup>+</sup> | 0.0576 <sup>+</sup> | 0.0146 <sup>+</sup> |
| Tobit                    | 0.0446       | 0.0070 | 0.5490              | 0.2252              | 0.0615              |
| ZIlogN                   | 0.5375       | 0.5233 | 0.9904*             | 0.9842*             | 0.9783*             |
| ZIG                      | 0.0443       | 0.0063 | 0.4273              | 0.1639              | 0.0551              |
| linear regression        | 0.0360       | 0.0040 | 0.4788 <sup>+</sup> | 0.1863 <sup>+</sup> | 0.0498 <sup>+</sup> |
| ZINQ-MinP                | 0.0433       | 0.0083 | 0.4940              | 0.1981              | 0.0565              |
| ZINQ-Cauchy              | 0.0485       | 0.0082 | 0.5578              | 0.2260              | 0.0613              |
| <i>CSS</i>               |              |        |                     |                     |                     |
| $\alpha$ -level          | Type I error |        | Power               |                     |                     |
|                          | Null         |        | Setting 1           | Setting 2           | Setting 3           |
|                          | 0.05         | 0.01   | 0.05                | 0.05                | 0.05                |
| Tobit                    | 0.0549       | 0.0135 | 0.5602              | 0.2365              | 0.0713              |
| ZIlogN                   | 0.0441       | 0.0062 | 0.5491              | 0.2079              | 0.0569              |
| ZIG                      | 0.0427       | 0.0063 | 0.5394              | 0.1984              | 0.0557              |
| linear regression        | 0.0508       | 0.0115 | 0.5929              | 0.2464              | 0.0674              |
| ZINQ-MinP                | 0.0436       | 0.0083 | 0.4638              | 0.1815              | 0.0556              |
| ZINQ-Cauchy              | 0.0485       | 0.0082 | 0.5068              | 0.2017              | 0.0593              |

Setting 1: 100% from HBP edf for HBP samples;

Setting 2: 80% from HBP edf and 20% from non-HBP edf for HBP samples;

Setting 3: 60% from HBP edf and 40% from non-HBP edf for HBP samples.

\*: power of a method that inflates type I error

<sup>+</sup>: power of a method that deflates type I error

Table S3: Type I error control and power on 10000 simulated datasets generated from the edf of *Anaerovorax*'s normalized abundance with sample size 200, under different settings with significance cutoffs 0.05 and 0.01.

| <b>sample size = 200</b> |              |        |                     |                     |                     |
|--------------------------|--------------|--------|---------------------|---------------------|---------------------|
| <i>Rarefaction</i>       |              |        |                     |                     |                     |
| $\alpha$ -level          | Type I error |        | Power               |                     |                     |
|                          | Null         |        | Setting 1           | Setting 2           | Setting 3           |
|                          | 0.05         | 0.01   | 0.05                | 0.05                | 0.05                |
| ZIP                      | 0.7378       | 0.6644 | 0.9822*             | 0.8763*             | 0.7300*             |
| ZINB                     | 0.1942       | 0.0712 | 0.7785*             | 0.4774*             | 0.2307*             |
| linear regression        | 0.0434       | 0.0057 | 0.7567              | 0.3365              | 0.0675              |
| ZINQ-MinP                | 0.0473       | 0.0102 | 0.7889              | 0.3394              | 0.0733              |
| ZINQ-Cauchy              | 0.0522       | 0.0101 | 0.8406              | 0.3862              | 0.0802              |
| <i>TSS</i>               |              |        |                     |                     |                     |
| $\alpha$ -level          | Type I error |        | Power               |                     |                     |
|                          | Null         |        | Setting 1           | Setting 2           | Setting 3           |
|                          | 0.05         | 0.01   | 0.05                | 0.05                | 0.05                |
| ZIB                      | 0.0129       | 0.0017 | 0.5800 <sup>+</sup> | 0.1384 <sup>+</sup> | 0.0161 <sup>+</sup> |
| Tobit                    | 0.0472       | 0.0070 | 0.8189              | 0.3838              | 0.0747              |
| ZIlogN                   | 0.5786       | 0.5613 | 0.9996*             | 0.9988*             | 0.9979*             |
| ZIG                      | 0.0543       | 0.0095 | 0.7300              | 0.3057              | 0.0764              |
| linear regression        | 0.0439       | 0.0055 | 0.7620              | 0.3329              | 0.0677              |
| ZINQ-MinP                | 0.0416       | 0.0075 | 0.8333              | 0.3646              | 0.0727              |
| ZINQ-Cauchy              | 0.0499       | 0.0079 | 0.8742              | 0.4284              | 0.0856              |
| <i>CSS</i>               |              |        |                     |                     |                     |
| $\alpha$ -level          | Type I error |        | Power               |                     |                     |
|                          | Null         |        | Setting 1           | Setting 2           | Setting 3           |
|                          | 0.05         | 0.01   | 0.05                | 0.05                | 0.05                |
| Tobit                    | 0.0543       | 0.0128 | 0.8343              | 0.4164              | 0.0902              |
| ZIlogN                   | 0.0502       | 0.0087 | 0.8520              | 0.4019              | 0.0788              |
| ZIG                      | 0.0478       | 0.0087 | 0.8572              | 0.3984              | 0.0745              |
| linear regression        | 0.0525       | 0.0116 | 0.8657              | 0.4428              | 0.0887              |
| ZINQ-MinP                | 0.0496       | 0.0081 | 0.7967              | 0.3470              | 0.0733              |
| ZINQ-Cauchy              | 0.0498       | 0.0079 | 0.8416              | 0.3863              | 0.0802              |

Setting 1: 100% from HBP edf for HBP samples;

Setting 2: 80% from HBP edf and 20% from non-HBP edf for HBP samples;

Setting 3: 60% from HBP edf and 40% from non-HBP edf for HBP samples.

\*: power of a method that inflates type I error

<sup>+</sup>: power of a method that deflates type I error

Table S4: Type I error control and power on 10000 simulated datasets generated from the edf of *Saccharibacteria*'s normalized abundance with sample size 50, under different settings with significance cutoffs 0.05 and 0.01.

| <b>sample size = 50</b> |              |        |                     |                     |                     |
|-------------------------|--------------|--------|---------------------|---------------------|---------------------|
| <i>Rarefaction</i>      |              |        |                     |                     |                     |
| $\alpha$ -level         | Type I error |        | Power               |                     |                     |
|                         | Null         |        | Setting 1           | Setting 2           | Setting 3           |
|                         | 0.05         | 0.01   | 0.05                | 0.05                | 0.05                |
| ZIP                     | 0.6745       | 0.5866 | 0.6456*             | 0.6324*             | 0.6285*             |
| ZINB                    | 0.2091       | 0.1124 | 0.1692*             | 0.1612*             | 0.1516*             |
| linear regression       | 0.0339       | 0.0039 | 0.0546 <sup>+</sup> | 0.0453 <sup>+</sup> | 0.0409 <sup>+</sup> |
| ZINQ-MinP               | 0.0375       | 0.0062 | 0.0603 <sup>+</sup> | 0.0473 <sup>+</sup> | 0.0393 <sup>+</sup> |
| ZINQ-Cauchy             | 0.0364       | 0.0053 | 0.0602 <sup>+</sup> | 0.0494 <sup>+</sup> | 0.0430 <sup>+</sup> |
| <i>TSS</i>              |              |        |                     |                     |                     |
| $\alpha$ -level         | Type I error |        | Power               |                     |                     |
|                         | Null         |        | Setting 1           | Setting 2           | Setting 3           |
|                         | 0.05         | 0.01   | 0.05                | 0.05                | 0.05                |
| ZIB                     | 0.0040       | 0.0000 | 0.0079 <sup>+</sup> | 0.0075 <sup>+</sup> | 0.0071 <sup>+</sup> |
| Tobit                   | 0.0427       | 0.0056 | 0.0579              | 0.0510              | 0.0487              |
| ZIlogN                  | 0.8939       | 0.8922 | 0.7540*             | 0.7606*             | 0.7639*             |
| ZIG                     | 0.0114       | 0.0010 | 0.0237 <sup>+</sup> | 0.0175 <sup>+</sup> | 0.0151 <sup>+</sup> |
| linear regression       | 0.0317       | 0.0027 | 0.0506 <sup>+</sup> | 0.0434 <sup>+</sup> | 0.0383 <sup>+</sup> |
| ZINQ-MinP               | 0.0278       | 0.0046 | 0.0567 <sup>+</sup> | 0.0390 <sup>+</sup> | 0.0298 <sup>+</sup> |
| ZINQ-Cauchy             | 0.0316       | 0.0063 | 0.0579 <sup>+</sup> | 0.0404 <sup>+</sup> | 0.0321 <sup>+</sup> |
| <i>CSS</i>              |              |        |                     |                     |                     |
| $\alpha$ -level         | Type I error |        | Power               |                     |                     |
|                         | Null         |        | Setting 1           | Setting 2           | Setting 3           |
|                         | 0.05         | 0.01   | 0.05                | 0.05                | 0.05                |
| Tobit                   | 0.0573       | 0.0142 | 0.0706              | 0.0637              | 0.0588              |
| ZIlogN                  | 0.0153       | 0.0026 | 0.0399 <sup>+</sup> | 0.0248 <sup>+</sup> | 0.0163 <sup>+</sup> |
| ZIG                     | 0.0143       | 0.0025 | 0.0364 <sup>+</sup> | 0.0226 <sup>+</sup> | 0.0160 <sup>+</sup> |
| linear regression       | 0.0483       | 0.0102 | 0.0634              | 0.0515              | 0.0475              |
| ZINQ-MinP               | 0.0274       | 0.0047 | 0.0669 <sup>+</sup> | 0.0416 <sup>+</sup> | 0.0300 <sup>+</sup> |
| ZINQ-Cauchy             | 0.0316       | 0.0063 | 0.0690 <sup>+</sup> | 0.0443 <sup>+</sup> | 0.0317 <sup>+</sup> |

Setting 1: 100% from HBP edf for HBP samples;

Setting 2: 80% from HBP edf and 20% from non-HBP edf for HBP samples;

Setting 3: 60% from HBP edf and 40% from non-HBP edf for HBP samples.

\*: power of a method that inflates type I error

<sup>+</sup>: power of a method that deflates type I error

Table S5: Type I error control and power on 10000 simulated datasets generated from the edf of *Saccharibacteria*'s normalized abundance with sample size 100, under different settings with significance cutoffs 0.05 and 0.01.

| <b>sample size = 100</b> |              |        |                     |                     |                     |
|--------------------------|--------------|--------|---------------------|---------------------|---------------------|
| <i>Rarefaction</i>       |              |        |                     |                     |                     |
| $\alpha$ -level          | Type I error |        |                     | Power               |                     |
|                          | Null         |        | Setting 1           | Setting 2           | Setting 3           |
|                          | 0.05         | 0.01   | 0.05                | 0.05                | 0.05                |
| ZIP                      | 0.6972       | 0.6130 | 0.6559*             | 0.6421*             | 0.6367*             |
| ZINB                     | 0.2476       | 0.1591 | 0.1971*             | 0.1824*             | 0.1736*             |
| linear regression        | 0.0373       | 0.0041 | 0.0572 <sup>+</sup> | 0.0465 <sup>+</sup> | 0.0421 <sup>+</sup> |
| ZINQ-MinP                | 0.0426       | 0.0085 | 0.0847              | 0.0541              | 0.0412              |
| ZINQ-Cauchy              | 0.0472       | 0.0086 | 0.0895              | 0.0604              | 0.0449              |
| <i>TSS</i>               |              |        |                     |                     |                     |
| $\alpha$ -level          | Type I error |        |                     | Power               |                     |
|                          | Null         |        | Setting 1           | Setting 2           | Setting 3           |
|                          | 0.05         | 0.01   | 0.05                | 0.05                | 0.05                |
| ZIB                      | 0.0111       | 0.0006 | 0.0194 <sup>+</sup> | 0.0147 <sup>+</sup> | 0.0115 <sup>+</sup> |
| Tobit                    | 0.0379       | 0.0058 | 0.0556 <sup>+</sup> | 0.0473 <sup>+</sup> | 0.0442 <sup>+</sup> |
| ZIlogN                   | 0.9699       | 0.9690 | 0.8595*             | 0.8603*             | 0.8594*             |
| ZIG                      | 0.0261       | 0.0027 | 0.0416 <sup>+</sup> | 0.0337 <sup>+</sup> | 0.0282 <sup>+</sup> |
| linear regression        | 0.0323       | 0.0039 | 0.0525 <sup>+</sup> | 0.0423 <sup>+</sup> | 0.0386 <sup>+</sup> |
| ZINQ-MinP                | 0.0385       | 0.0078 | 0.1101 <sup>+</sup> | 0.0637 <sup>+</sup> | 0.0396 <sup>+</sup> |
| ZINQ-Cauchy              | 0.0439       | 0.0088 | 0.1317              | 0.0736              | 0.0445              |
| <i>CSS</i>               |              |        |                     |                     |                     |
| $\alpha$ -level          | Type I error |        |                     | Power               |                     |
|                          | Null         |        | Setting 1           | Setting 2           | Setting 3           |
|                          | 0.05         | 0.01   | 0.05                | 0.05                | 0.05                |
| Tobit                    | 0.0562       | 0.0138 | 0.0742              | 0.0594              | 0.0549              |
| ZIlogN                   | 0.0252       | 0.0040 | 0.0956 <sup>+</sup> | 0.0491 <sup>+</sup> | 0.0291 <sup>+</sup> |
| ZIG                      | 0.0242       | 0.0033 | 0.0901 <sup>+</sup> | 0.0460 <sup>+</sup> | 0.0297 <sup>+</sup> |
| linear regression        | 0.0509       | 0.0119 | 0.0730              | 0.0562              | 0.0513              |
| ZINQ-MinP                | 0.0384       | 0.0078 | 0.1767 <sup>+</sup> | 0.0824 <sup>+</sup> | 0.0428 <sup>+</sup> |
| ZINQ-Cauchy              | 0.0421       | 0.0085 | 0.1745              | 0.0860              | 0.0450              |

Setting 1: 100% from HBP edf for HBP samples;

Setting 2: 80% from HBP edf and 20% from non-HBP edf for HBP samples;

Setting 3: 60% from HBP edf and 40% from non-HBP edf for HBP samples.

\*: power of a method that inflates type I error

<sup>+</sup>: power of a method that deflates type I error

Table S6: Type I error control and power on 10000 simulated datasets generated from the edf of *Saccharibacteria*'s normalized abundance with sample size 200, under different settings with significance cutoffs 0.05 and 0.01.

| <b>sample size = 200</b> |              |        |                     |                     |                     |
|--------------------------|--------------|--------|---------------------|---------------------|---------------------|
| <i>Rarefaction</i>       |              |        |                     |                     |                     |
| $\alpha$ -level          | Type I error |        | Power               |                     |                     |
|                          | Null         |        | Setting 1           | Setting 2           | Setting 3           |
|                          | 0.05         | 0.01   | 0.05                | 0.05                | 0.05                |
| ZIP                      | 0.7361       | 0.6695 | 0.6909*             | 0.6757*             | 0.6682*             |
| ZINB                     | 0.3236       | 0.2256 | 0.2453*             | 0.2332*             | 0.2215*             |
| linear regression        | 0.0353       | 0.0056 | 0.0622 <sup>+</sup> | 0.0502 <sup>+</sup> | 0.0417 <sup>+</sup> |
| ZINQ-MinP                | 0.0463       | 0.0082 | 0.1575              | 0.0862              | 0.0535              |
| ZINQ-Cauchy              | 0.0510       | 0.0086 | 0.1712              | 0.0945              | 0.0535              |
| <i>TSS</i>               |              |        |                     |                     |                     |
| $\alpha$ -level          | Type I error |        | Power               |                     |                     |
|                          | Null         |        | Setting 1           | Setting 2           | Setting 3           |
|                          | 0.05         | 0.01   | 0.05                | 0.05                | 0.05                |
| ZIB                      | 0.0093       | 0.0018 | 0.0248 <sup>+</sup> | 0.0141 <sup>+</sup> | 0.0086 <sup>+</sup> |
| Tobit                    | 0.0358       | 0.0046 | 0.0510 <sup>+</sup> | 0.0466 <sup>+</sup> | 0.0425 <sup>+</sup> |
| ZIlogN                   | 0.9971       | 0.9967 | 0.9466*             | 0.9436*             | 0.9414*             |
| ZIG                      | 0.0429       | 0.0055 | 0.0670              | 0.0534              | 0.0452              |
| linear regression        | 0.0315       | 0.0046 | 0.0486 <sup>+</sup> | 0.0440 <sup>+</sup> | 0.0402 <sup>+</sup> |
| ZINQ-MinP                | 0.0428       | 0.0073 | 0.2218              | 0.0958              | 0.0466              |
| ZINQ-Cauchy              | 0.0477       | 0.0082 | 0.2475              | 0.1158              | 0.0556              |
| <i>CSS</i>               |              |        |                     |                     |                     |
| $\alpha$ -level          | Type I error |        | Power               |                     |                     |
|                          | Null         |        | Setting 1           | Setting 2           | Setting 3           |
|                          | 0.05         | 0.01   | 0.05                | 0.05                | 0.05                |
| Tobit                    | 0.0535       | 0.0123 | 0.0950              | 0.0687              | 0.0561              |
| ZIlogN                   | 0.0400       | 0.0060 | 0.2026              | 0.0920              | 0.0451              |
| ZIG                      | 0.0402       | 0.0057 | 0.2088              | 0.0956              | 0.0479              |
| linear regression        | 0.0510       | 0.0113 | 0.1031              | 0.0703              | 0.0540              |
| ZINQ-MinP                | 0.0382       | 0.0077 | 0.3529 <sup>+</sup> | 0.1369 <sup>+</sup> | 0.0488 <sup>+</sup> |
| ZINQ-Cauchy              | 0.0459       | 0.0095 | 0.3533              | 0.1443              | 0.0560              |

Setting 1: 100% from HBP edf for HBP samples;

Setting 2: 80% from HBP edf and 20% from non-HBP edf for HBP samples;

Setting 3: 60% from HBP edf and 40% from non-HBP edf for HBP samples.

\*: power of a method that inflates type I error

<sup>+</sup>: power of a method that deflates type I error

Table S7: Type I error control and power on 10000 simulated datasets generated from the edf of *Propionispira*'s normalized abundance with sample size 600, under different settings with significance cutoffs 0.05 and 0.01.

| <b>Propionispira</b> |              |        |                     |                     |                     |
|----------------------|--------------|--------|---------------------|---------------------|---------------------|
| <i>Rarefaction</i>   |              |        |                     |                     |                     |
| $\alpha$ -level      | Type I error |        | Power               |                     |                     |
|                      | Null         |        | Setting 1           | Setting 2           | Setting 3           |
|                      | 0.05         | 0.01   | 0.05                | 0.05                | 0.05                |
| ZIP                  | 0.7145       | 0.6359 | 0.9812*             | 0.8815*             | 0.7683*             |
| ZINB                 | 0.1831       | 0.0522 | 0.9055*             | 0.5545*             | 0.2454*             |
| linear regression    | 0.0477       | 0.0048 | 0.8203              | 0.3546              | 0.0815              |
| ZINQ-MinP            | 0.0457       | 0.0064 | 0.6676              | 0.2597              | 0.0660              |
| ZINQ-Cauchy          | 0.0435       | 0.0074 | 0.7259              | 0.3070              | 0.0748              |
| <i>TSS</i>           |              |        |                     |                     |                     |
| $\alpha$ -level      | Type I error |        | Power               |                     |                     |
|                      | Null         |        | Setting 1           | Setting 2           | Setting 3           |
|                      | 0.05         | 0.01   | 0.05                | 0.05                | 0.05                |
| ZIB                  | 0.0125       | 0.0022 | 0.6267 <sup>+</sup> | 0.2110 <sup>+</sup> | 0.0409 <sup>+</sup> |
| Tobit                | 0.0458       | 0.0067 | 0.8859              | 0.4482              | 0.0888              |
| ZIlogN               | 0.9003       | 0.8964 | 0.8399*             | 0.5318*             | 0.3659*             |
| ZIG                  | 0.0452       | 0.0081 | 0.8495              | 0.3724              | 0.0802              |
| linear regression    | 0.0486       | 0.0058 | 0.8507              | 0.3750              | 0.0833              |
| ZINQ-MinP            | 0.0465       | 0.0082 | 0.7051              | 0.2766              | 0.0680              |
| ZINQ-Cauchy          | 0.0459       | 0.0070 | 0.8176              | 0.3879              | 0.0813              |
| <i>CSS</i>           |              |        |                     |                     |                     |
| $\alpha$ -level      | Type I error |        | Power               |                     |                     |
|                      | Null         |        | Setting 1           | Setting 2           | Setting 3           |
|                      | 0.05         | 0.01   | 0.05                | 0.05                | 0.05                |
| Tobit                | 0.0433       | 0.0063 | 0.8311              | 0.4043              | 0.0841              |
| ZIlogN               | 0.0439       | 0.0083 | 0.7339              | 0.3162              | 0.0714              |
| ZIG                  | 0.0423       | 0.0078 | 0.7838              | 0.3390              | 0.0715              |
| linear regression    | 0.0517       | 0.0109 | 0.8670              | 0.4412              | 0.0922              |
| ZINQ-MinP            | 0.0467       | 0.0082 | 0.7195              | 0.2836              | 0.0679              |
| ZINQ-Cauchy          | 0.0459       | 0.0070 | 0.8254              | 0.3904              | 0.0819              |

Setting 1: 100% from HBP edf for HBP samples;

Setting 2: 80% from HBP edf and 20% from non-HBP edf for HBP samples;

Setting 3: 60% from HBP edf and 40% from non-HBP edf for HBP samples.

\*: power of a method that inflates type I error

<sup>+</sup>: power of a method that deflates type I error



Table S8: Type I error control and power on 10000 simulated datasets generated from the edf of *Corynebacterium*'s normalized abundance with sample size 600, under different settings with significance cutoffs 0.05 and 0.01.

| <b>Corynebacterium</b> |              |        |                     |                     |                     |
|------------------------|--------------|--------|---------------------|---------------------|---------------------|
| <i>Rarefaction</i>     |              |        |                     |                     |                     |
| $\alpha$ -level        | Type I error |        |                     | Power               |                     |
|                        | Null         |        | Setting 1           | Setting 2           | Setting 3           |
|                        | 0.05         | 0.01   | 0.05                | 0.05                | 0.05                |
| ZIP                    | 0.3911       | 0.2455 | 0.6017*             | 0.4351*             | 0.3364*             |
| ZINB                   | 0.2655       | 0.1137 | 0.4759*             | 0.3065*             | 0.2170*             |
| linear regression      | 0.0333       | 0.0045 | 0.0658 <sup>+</sup> | 0.0513 <sup>+</sup> | 0.0409 <sup>+</sup> |
| ZINQ-MinP              | 0.0395       | 0.0048 | 0.1892 <sup>+</sup> | 0.0797 <sup>+</sup> | 0.0470 <sup>+</sup> |
| ZINQ-Cauchy            | 0.0434       | 0.0063 | 0.2639              | 0.1145              | 0.0486              |
| <i>TSS</i>             |              |        |                     |                     |                     |
| $\alpha$ -level        | Type I error |        |                     | Power               |                     |
|                        | Null         |        | Setting 1           | Setting 2           | Setting 3           |
|                        | 0.05         | 0.01   | 0.05                | 0.05                | 0.05                |
| ZIB                    | 0.0051       | 0.0004 | 0.0057 <sup>+</sup> | 0.0057 <sup>+</sup> | 0.0059 <sup>+</sup> |
| Tobit                  | 0.0490       | 0.0080 | 0.0587              | 0.0523              | 0.0485              |
| ZIlogN                 | 0.2228       | 0.1476 | 0.4215*             | 0.2770*             | 0.1934*             |
| ZIG                    | 0.0563       | 0.0087 | 0.1057              | 0.0804              | 0.0612              |
| linear regression      | 0.0483       | 0.0060 | 0.0969              | 0.0655              | 0.0494              |
| ZINQ-MinP              | 0.0396       | 0.0063 | 0.6445 <sup>+</sup> | 0.2323 <sup>+</sup> | 0.0516 <sup>+</sup> |
| ZINQ-Cauchy            | 0.0464       | 0.0081 | 0.3814              | 0.1102              | 0.0471              |
| <i>CSS</i>             |              |        |                     |                     |                     |
| $\alpha$ -level        | Type I error |        |                     | Power               |                     |
|                        | Null         |        | Setting 1           | Setting 2           | Setting 3           |
|                        | 0.05         | 0.01   | 0.05                | 0.05                | 0.05                |
| Tobit                  | 0.0474       | 0.0074 | 0.0524              | 0.0466              | 0.0453              |
| ZIlogN                 | 0.0464       | 0.0078 | 0.2293              | 0.1037              | 0.0519              |
| ZIG                    | 0.0480       | 0.0097 | 0.1937              | 0.0972              | 0.0534              |
| linear regression      | 0.0521       | 0.0106 | 0.0870              | 0.0635              | 0.0525              |
| ZINQ-MinP              | 0.0468       | 0.0087 | 0.7047              | 0.2805              | 0.0664              |
| ZINQ-Cauchy            | 0.0459       | 0.0081 | 0.4510              | 0.1288              | 0.0477              |

Setting 1: 100% from HBP edf for HBP samples;

Setting 2: 80% from HBP edf and 20% from non-HBP edf for HBP samples;

Setting 3: 60% from HBP edf and 40% from non-HBP edf for HBP samples.

\*: power of a method that inflates type I error

<sup>+</sup>: power of a method that deflates type I error

Table S9: Average FPR and TPR by adjusted analysis on CLR transformed simulated OTU tables with sample size 531 generated from the two-part quantile model fitted on CARDIA data, over 1000 runs according to significance cutoffs 0.05 and 0.01.

| <b>sample size = 531</b> |            |        |                        |        |
|--------------------------|------------|--------|------------------------|--------|
|                          | <i>CLR</i> |        | <i>CLR with zeroes</i> |        |
|                          | FPR        |        |                        |        |
| $\alpha$ -level          | 0.05       | 0.01   | 0.05                   | 0.01   |
| corncob                  | -          | -      | -                      | -      |
| DESeq2                   | -          | -      | -                      | -      |
| edgeR                    | -          | -      | -                      | -      |
| LDM                      | 0.0484     | 0.0099 | 0.0493                 | 0.0101 |
| limma                    | -          | -      | -                      | -      |
| linear regression        | 0.0488     | 0.0099 | 0.0497                 | 0.0100 |
| metagenomeSeq            | -          | -      | -                      | -      |
| Monocle                  | -          | -      | -                      | -      |
| QRank                    | 0.0487     | 0.0089 | 0.0486                 | 0.0096 |
| ZINQ-MinP                | 0.0418     | 0.0082 | 0.0479                 | 0.0092 |
| ZINQ-Cauchy              | 0.0540     | 0.0107 | 0.0515                 | 0.0101 |
|                          | TPR        |        |                        |        |
| $\alpha$ -level          | 0.05       | 0.01   | 0.05                   | 0.01   |
| corncob                  | -          | -      | -                      | -      |
| DESeq2                   | -          | -      | -                      | -      |
| edgeR                    | -          | -      | -                      | -      |
| LDM                      | 0.3975     | 0.2637 | 0.2864                 | 0.1631 |
| limma                    | -          | -      | -                      | -      |
| linear regression        | 0.3986     | 0.2639 | 0.2874                 | 0.1630 |
| metagenomeSeq            | -          | -      | -                      | -      |
| Monocle                  | -          | -      | -                      | -      |
| QRank                    | 0.5853     | 0.4152 | 0.3189                 | 0.1726 |
| ZINQ-MinP                | 0.5410     | 0.3625 | 0.4422                 | 0.2659 |
| ZINQ-Cauchy              | 0.5844     | 0.4000 | 0.4778                 | 0.2963 |

\*: power of a method that inflates type I error

+: power of a method that deflates type I error

Table S10: Average FPR and TPR by adjusted analysis on un-normalized/normalized simulated OTU tables with sample size 50 generated from the two-part quantile model fitted on CARDIA data, over 1000 runs according to significance cutoffs 0.05 and 0.01.

| <b>sample size = 50</b> |              |                     |                     |                     |                     |                     |            |                     |
|-------------------------|--------------|---------------------|---------------------|---------------------|---------------------|---------------------|------------|---------------------|
|                         | <i>Count</i> |                     | <i>Rarefaction</i>  |                     | <i>TSS</i>          |                     | <i>CSS</i> |                     |
|                         | FPR          |                     |                     |                     |                     |                     |            |                     |
| $\alpha$ -level         | 0.05         | 0.01                | 0.05                | 0.01                | 0.05                | 0.01                | 0.05       | 0.01                |
| corncob                 | 0.1652       | 0.0849              | 0.1606              | 0.0792              | -                   | -                   | -          | -                   |
| DESeq2                  | 0.0553       | 0.0185              | 0.0488              | 0.0158              | -                   | -                   | -          | -                   |
| edgeR                   | 0.0845       | 0.0297              | 0.0795              | 0.0262              | -                   | -                   | -          | -                   |
| LDM                     | 0.0470       | 0.0085              | 0.0464              | 0.0086              | 0.0470              | 0.0085              | 0.0487     | 0.0097              |
| limma                   | 0.0605       | 0.0141              | 0.0706              | 0.0183              | -                   | -                   | -          | -                   |
| linear regression       | 0.0400       | 0.0068              | 0.0394              | 0.0064              | 0.0395              | 0.0065              | 0.0486     | 0.0095              |
| metagenomeSeq           | -            | -                   | -                   | -                   | -                   | -                   | 0.1613     | 0.0761              |
| Monocle                 | 0.7021       | 0.6414              | 0.6460              | 0.5797              | 0.0569              | 0.0114              | 0.0624     | 0.0145              |
| QRank                   | 0.0453       | 0.0073              | 0.0460              | 0.0077              | 0.0458              | 0.0073              | 0.0437     | 0.0071              |
| ZINQ-MinP               | 0.0516       | 0.0095              | 0.0525              | 0.0096              | 0.0793              | 0.0233              | 0.0568     | 0.0110              |
| ZINQ-Cauchy             | 0.0516       | 0.0089              | 0.0489              | 0.0082              | 0.0542              | 0.0123              | 0.0532     | 0.0094              |
|                         | TPR          |                     |                     |                     |                     |                     |            |                     |
| $\alpha$ -level         | 0.05         | 0.01                | 0.05                | 0.01                | 0.05                | 0.01                | 0.05       | 0.01                |
| corncob                 | 0.2048*      | 0.1080*             | 0.1984*             | 0.1017*             | -                   | -                   | -          | -                   |
| DESeq2                  | 0.0877       | 0.0356*             | 0.0736              | 0.0290*             | -                   | -                   | -          | -                   |
| edgeR                   | 0.1266*      | 0.0516*             | 0.1165*             | 0.0446*             | -                   | -                   | -          | -                   |
| LDM                     | 0.0748       | 0.0176              | 0.0722              | 0.0169              | 0.0748              | 0.0176              | 0.0952     | 0.0262              |
| limma                   | 0.1020*      | 0.0329*             | 0.1084*             | 0.0352*             | -                   | -                   | -          | -                   |
| linear regression       | 0.0668       | 0.0136 <sup>+</sup> | 0.0623 <sup>+</sup> | 0.0124 <sup>+</sup> | 0.0645 <sup>+</sup> | 0.0133 <sup>+</sup> | 0.0933     | 0.0257              |
| metagenomeSeq           | -            | -                   | -                   | -                   | -                   | -                   | 0.2105*    | 0.1058*             |
| Monocle                 | 0.7380*      | 0.6803*             | 0.6811*             | 0.6159*             | 0.0879              | 0.0216              | 0.1136*    | 0.0359*             |
| QRank                   | 0.0690       | 0.0143 <sup>+</sup> | 0.0639              | 0.0130 <sup>+</sup> | 0.0693              | 0.0143 <sup>+</sup> | 0.0649     | 0.0133 <sup>+</sup> |
| ZINQ-MinP               | 0.0769       | 0.0159              | 0.0710              | 0.0141              | 0.0987*             | 0.0288*             | 0.0786     | 0.0170              |
| ZINQ-Cauchy             | 0.0848       | 0.0181              | 0.0740              | 0.0150              | 0.0810              | 0.0204*             | 0.0842     | 0.0182              |

\*: power of a method that inflates type I error

<sup>+</sup>: power of a method that deflates type I error

Table S11: Average FPR and TPR by adjusted analysis on un-normalized/normalized simulated OTU tables with sample size 100 generated from the two-part quantile model fitted on CARDIA data, over 1000 runs according to significance cutoffs 0.05 and 0.01.

| <b>sample size = 100</b> |              |                     |                    |                     |            |                     |            |         |
|--------------------------|--------------|---------------------|--------------------|---------------------|------------|---------------------|------------|---------|
|                          | <i>Count</i> |                     | <i>Rarefaction</i> |                     | <i>TSS</i> |                     | <i>CSS</i> |         |
|                          | FPR          |                     |                    |                     |            |                     |            |         |
| $\alpha$ -level          | 0.05         | 0.01                | 0.05               | 0.01                | 0.05       | 0.01                | 0.05       | 0.01    |
| corncob                  | 0.1214       | 0.0569              | 0.1159             | 0.0526              | -          | -                   | -          | -       |
| DESeq2                   | 0.0645       | 0.0225              | 0.0553             | 0.0186              | -          | -                   | -          | -       |
| edgeR                    | 0.0895       | 0.0316              | 0.0818             | 0.0267              | -          | -                   | -          | -       |
| LDM                      | 0.0486       | 0.0094              | 0.0492             | 0.0095              | 0.0486     | 0.0094              | 0.0496     | 0.0094  |
| limma                    | 0.0582       | 0.0136              | 0.0712             | 0.0190              | -          | -                   | -          | -       |
| linear regression        | 0.0423       | 0.0069              | 0.0424             | 0.0072              | 0.0420     | 0.0069              | 0.0499     | 0.0097  |
| metagenomeSeq            | -            | -                   | -                  | -                   | -          | -                   | 0.1634     | 0.0826  |
| Monocle                  | 0.7172       | 0.6586              | 0.6544             | 0.5897              | 0.0514     | 0.0094              | 0.0564     | 0.0122  |
| QRank                    | 0.0479       | 0.0090              | 0.0490             | 0.0094              | 0.0482     | 0.0092              | 0.0470     | 0.0089  |
| ZINQ-MinP                | 0.0527       | 0.0104              | 0.0550             | 0.0106              | 0.0536     | 0.0102              | 0.0505     | 0.0097  |
| ZINQ-Cauchy              | 0.0543       | 0.0101              | 0.0530             | 0.0097              | 0.0545     | 0.0102              | 0.0539     | 0.0104  |
|                          | TPR          |                     |                    |                     |            |                     |            |         |
| $\alpha$ -level          | 0.05         | 0.01                | 0.05               | 0.01                | 0.05       | 0.01                | 0.05       | 0.01    |
| corncob                  | 0.1948*      | 0.0979*             | 0.1812*            | 0.0866*             | -          | -                   | -          | -       |
| DESeq2                   | 0.1262*      | 0.0597*             | 0.1042             | 0.0455*             | -          | -                   | -          | -       |
| edgeR                    | 0.1711*      | 0.0793*             | 0.1527*            | 0.0663*             | -          | -                   | -          | -       |
| LDM                      | 0.1086       | 0.0305              | 0.1027             | 0.0282              | 0.1086     | 0.0305              | 0.1430     | 0.0505  |
| limma                    | 0.1454       | 0.0543*             | 0.1458*            | 0.0545*             | -          | -                   | -          | -       |
| linear regression        | 0.1000       | 0.0247 <sup>+</sup> | 0.0909             | 0.0213 <sup>+</sup> | 0.0957     | 0.0230 <sup>+</sup> | 0.1404     | 0.0498  |
| metagenomeSeq            | -            | -                   | -                  | -                   | -          | -                   | 0.2614*    | 0.1481* |
| Monocle                  | 0.7727*      | 0.7196*             | 0.7096*            | 0.6478*             | 0.1115     | 0.0297              | 0.1524     | 0.0571* |
| QRank                    | 0.1044       | 0.0289              | 0.0913             | 0.0234              | 0.1015     | 0.0287              | 0.0996     | 0.0273  |
| ZINQ-MinP                | 0.1171       | 0.0328              | 0.1020             | 0.0263              | 0.1141     | 0.0314              | 0.1125     | 0.0315  |
| ZINQ-Cauchy              | 0.1375       | 0.0415              | 0.1184             | 0.0324              | 0.1339     | 0.0398              | 0.1328     | 0.0392  |

\*: power of a method that inflates type I error

<sup>+</sup>: power of a method that deflates type I error

Table S12: Average FPR and TPR by adjusted analysis on un-normalized/normalized simulated OTU tables with sample size 200 generated from the two-part quantile model fitted on CARDIA data, over 1000 runs according to significance cutoffs 0.05 and 0.01.

| <b>sample size = 200</b> |              |                     |                    |                     |            |                     |            |         |
|--------------------------|--------------|---------------------|--------------------|---------------------|------------|---------------------|------------|---------|
|                          | <i>Count</i> |                     | <i>Rarefaction</i> |                     | <i>TSS</i> |                     | <i>CSS</i> |         |
|                          | FPR          |                     |                    |                     |            |                     |            |         |
| $\alpha$ -level          | 0.05         | 0.01                | 0.05               | 0.01                | 0.05       | 0.01                | 0.05       | 0.01    |
| corncob                  | 0.1074       | 0.0506              | 0.0976             | 0.0429              | -          | -                   | -          | -       |
| DESeq2                   | 0.0748       | 0.0282              | 0.0633             | 0.0227              | -          | -                   | -          | -       |
| edgeR                    | 0.0959       | 0.0365              | 0.0865             | 0.0298              | -          | -                   | -          | -       |
| LDM                      | 0.0503       | 0.0093              | 0.0499             | 0.0095              | 0.0503     | 0.0093              | 0.0495     | 0.0097  |
| limma                    | 0.0574       | 0.0128              | 0.0722             | 0.0198              | -          | -                   | -          | -       |
| linear regression        | 0.0447       | 0.0073              | 0.0446             | 0.0074              | 0.0446     | 0.0072              | 0.0495     | 0.0098  |
| metagenomeSeq            | -            | -                   | -                  | -                   | -          | -                   | 0.1601     | 0.0803  |
| Monocle                  | 0.7217       | 0.6643              | 0.6540             | 0.5901              | 0.0499     | 0.0085              | 0.0529     | 0.0108  |
| QRank                    | 0.0502       | 0.0097              | 0.0490             | 0.0096              | 0.0499     | 0.0096              | 0.0498     | 0.0093  |
| ZINQ-MinP                | 0.0504       | 0.0100              | 0.0510             | 0.0097              | 0.0495     | 0.0100              | 0.0495     | 0.0097  |
| ZINQ-Cauchy              | 0.0546       | 0.0111              | 0.0541             | 0.0102              | 0.0551     | 0.0110              | 0.0539     | 0.0112  |
|                          | TPR          |                     |                    |                     |            |                     |            |         |
| $\alpha$ -level          | 0.05         | 0.01                | 0.05               | 0.01                | 0.05       | 0.01                | 0.05       | 0.01    |
| corncob                  | 0.2564*      | 0.1386*             | 0.2257*            | 0.1171*             | -          | -                   | -          | -       |
| DESeq2                   | 0.1927*      | 0.1093*             | 0.1611*            | 0.0835*             | -          | -                   | -          | -       |
| edgeR                    | 0.2472*      | 0.1368*             | 0.2194*            | 0.1122*             | -          | -                   | -          | -       |
| LDM                      | 0.1703       | 0.0620              | 0.1592             | 0.0564              | 0.1703     | 0.0620              | 0.2292     | 0.1070  |
| limma                    | 0.2240       | 0.1067*             | 0.2137*            | 0.0988*             | -          | -                   | -          | -       |
| linear regression        | 0.1655       | 0.0563 <sup>+</sup> | 0.1486             | 0.0465 <sup>+</sup> | 0.1583     | 0.0517 <sup>+</sup> | 0.2273     | 0.1071  |
| metagenomeSeq            | -            | -                   | -                  | -                   | -          | -                   | 0.3383*    | 0.2153* |
| Monocle                  | 0.8110*      | 0.7646*             | 0.7485*            | 0.6905*             | 0.1670     | 0.0571              | 0.2339     | 0.1123  |
| QRank                    | 0.1780       | 0.0699              | 0.1445             | 0.0514              | 0.1701     | 0.0644              | 0.1683     | 0.0638  |
| ZINQ-MinP                | 0.2038       | 0.0806              | 0.1637             | 0.0582              | 0.1948     | 0.0770              | 0.1941     | 0.0764  |
| ZINQ-Cauchy              | 0.2363       | 0.1013              | 0.1943             | 0.0745              | 0.2275     | 0.0960              | 0.2244     | 0.0954  |

\*: power of a method that inflates type I error

<sup>+</sup>: power of a method that deflates type I error

Table S13: Average FPR and TPR by unadjusted analysis on CLR transformed simulated OTU tables with sample size 531 generated from the Dirichlet-Multinomial models fitted on CARDIA data, over 1000 runs according to significance cutoffs 0.05 and 0.01.

| <b>sample size = 531</b> |            |        |                        |        |
|--------------------------|------------|--------|------------------------|--------|
|                          | <i>CLR</i> |        | <i>CLR with zeroes</i> |        |
|                          | FPR        |        |                        |        |
| $\alpha$ -level          | 0.05       | 0.01   | 0.05                   | 0.01   |
| corncob                  | -          | -      | -                      | -      |
| DESeq2                   | -          | -      | -                      | -      |
| edgeR                    | -          | -      | -                      | -      |
| LDM                      | 0.0493     | 0.0099 | 0.0493                 | 0.0097 |
| limma                    | -          | -      | -                      | -      |
| linear regression        | 0.0497     | 0.0099 | 0.0497                 | 0.0097 |
| metagenomeSeq            | -          | -      | -                      | -      |
| Monocle                  | -          | -      | -                      | -      |
| QRank                    | 0.0496     | 0.0100 | 0.0487                 | 0.0097 |
| ZINQ-MinP                | 0.0412     | 0.0082 | 0.0470                 | 0.0092 |
| ZINQ-Cauchy              | 0.0544     | 0.0109 | 0.0510                 | 0.0101 |
|                          | TPR        |        |                        |        |
| $\alpha$ -level          | 0.05       | 0.01   | 0.05                   | 0.01   |
| corncob                  | -          | -      | -                      | -      |
| DESeq2                   | -          | -      | -                      | -      |
| edgeR                    | -          | -      | -                      | -      |
| LDM                      | 0.2889     | 0.1660 | 0.1949                 | 0.0934 |
| limma                    | -          | -      | -                      | -      |
| linear regression        | 0.2903     | 0.1661 | 0.1962                 | 0.0936 |
| metagenomeSeq            | -          | -      | -                      | -      |
| Monocle                  | -          | -      | -                      | -      |
| QRank                    | 0.5059     | 0.3366 | 0.1997                 | 0.0895 |
| ZINQ-MinP                | 0.4503     | 0.2734 | 0.2432                 | 0.1200 |
| ZINQ-Cauchy              | 0.4828     | 0.3001 | 0.2856                 | 0.1471 |

\*: power of a method that inflates type I error

+: power of a method that deflates type I error

Table S14: Average FPR and TPR by unadjusted analysis on un-normalized/normalized simulated OTU tables with sample size 50 generated from the Dirichlet-Multinomial models fitted on CARDIA data, over 1000 runs according to significance cutoffs 0.05 and 0.01.

| <b>sample size = 50</b> |                     |                     |                     |                     |                     |                     |            |                     |
|-------------------------|---------------------|---------------------|---------------------|---------------------|---------------------|---------------------|------------|---------------------|
|                         | <i>Count</i>        |                     | <i>Rarefaction</i>  |                     | <i>TSS</i>          |                     | <i>CSS</i> |                     |
|                         | FPR                 |                     |                     |                     |                     |                     |            |                     |
| $\alpha$ -level         | 0.05                | 0.01                | 0.05                | 0.01                | 0.05                | 0.01                | 0.05       | 0.01                |
| corncob                 | 0.0838              | 0.0312              | 0.0840              | 0.0312              | -                   | -                   | -          | -                   |
| DESeq2                  | 0.1303              | 0.0585              | 0.1302              | 0.0583              | -                   | -                   | -          | -                   |
| edgeR                   | 0.0727              | 0.0212              | 0.0726              | 0.0215              | -                   | -                   | -          | -                   |
| LDM                     | 0.0490              | 0.0094              | 0.0490              | 0.0094              | 0.0490              | 0.0094              | 0.0498     | 0.0096              |
| limma                   | 0.0540              | 0.0123              | 0.0537              | 0.0124              | -                   | -                   | -          | -                   |
| linear regression       | 0.0360              | 0.0056              | 0.0360              | 0.0056              | 0.0361              | 0.0056              | 0.0493     | 0.0098              |
| metagenomeSeq           | -                   | -                   | -                   | -                   | -                   | -                   | 0.1655     | 0.0778              |
| Monocle                 | 0.9464              | 0.9295              | 0.9462              | 0.9289              | 0.0425              | 0.0071              | 0.0558     | 0.0118              |
| QRank                   | 0.0444              | 0.0070              | 0.0449              | 0.0071              | 0.0437              | 0.0071              | 0.0452     | 0.0073              |
| ZINQ-MinP               | 0.0411              | 0.0067              | 0.0414              | 0.0065              | 0.0419              | 0.0082              | 0.0420     | 0.0083              |
| ZINQ-Cauchy             | 0.0443              | 0.0068              | 0.0443              | 0.0067              | 0.0436              | 0.0069              | 0.0437     | 0.0069              |
|                         | TPR                 |                     |                     |                     |                     |                     |            |                     |
| $\alpha$ -level         | 0.05                | 0.01                | 0.05                | 0.01                | 0.05                | 0.01                | 0.05       | 0.01                |
| corncob                 | 0.1020*             | 0.0383*             | 0.1019*             | 0.0385*             | -                   | -                   | -          | -                   |
| DESeq2                  | 0.1487*             | 0.0701*             | 0.1486*             | 0.0698*             | -                   | -                   | -          | -                   |
| edgeR                   | 0.0889*             | 0.0287*             | 0.0896*             | 0.0288*             | -                   | -                   | -          | -                   |
| LDM                     | 0.0652              | 0.0144              | 0.0652              | 0.0144              | 0.0652              | 0.0144              | 0.0779     | 0.0203              |
| limma                   | 0.0808              | 0.0222*             | 0.0808              | 0.0224*             | -                   | -                   | -          | -                   |
| linear regression       | 0.0490 <sup>+</sup> | 0.0086 <sup>+</sup> | 0.0490 <sup>+</sup> | 0.0085 <sup>+</sup> | 0.0489 <sup>+</sup> | 0.0085 <sup>+</sup> | 0.0763     | 0.0197              |
| metagenomeSeq           | -                   | -                   | -                   | -                   | -                   | -                   | 0.1881*    | 0.0912*             |
| Monocle                 | 0.9496*             | 0.9338*             | 0.9492*             | 0.9332*             | 0.0568              | 0.0104 <sup>+</sup> | 0.0848     | 0.0232              |
| QRank                   | 0.0588              | 0.0109 <sup>+</sup> | 0.0586              | 0.0110 <sup>+</sup> | 0.0587              | 0.0112 <sup>+</sup> | 0.0578     | 0.0109 <sup>+</sup> |
| ZINQ-MinP               | 0.0533              | 0.0101 <sup>+</sup> | 0.0529              | 0.0099 <sup>+</sup> | 0.0550              | 0.0116              | 0.0550     | 0.0114              |
| ZINQ-Cauchy             | 0.0622              | 0.0113 <sup>+</sup> | 0.0619              | 0.0112 <sup>+</sup> | 0.0620              | 0.0115 <sup>+</sup> | 0.0623     | 0.0115 <sup>+</sup> |

\*: power of a method that inflates type I error

<sup>+</sup>: power of a method that deflates type I error

Table S15: Average FPR and TPR by unadjusted analysis on un-normalized/normalized simulated OTU tables with sample size 100 generated from the Dirichlet-Multinomial models fitted on CARDIA data, over 1000 runs according to significance cutoffs 0.05 and 0.01.

| <b>sample size = 100</b> |              |                     |                    |                     |            |                     |            |                     |
|--------------------------|--------------|---------------------|--------------------|---------------------|------------|---------------------|------------|---------------------|
|                          | <i>Count</i> |                     | <i>Rarefaction</i> |                     | <i>TSS</i> |                     | <i>CSS</i> |                     |
|                          | FPR          |                     |                    |                     |            |                     |            |                     |
| $\alpha$ -level          | 0.05         | 0.01                | 0.05               | 0.01                | 0.05       | 0.01                | 0.05       | 0.01                |
| corncob                  | 0.0666       | 0.0192              | 0.0668             | 0.0192              | -          | -                   | -          | -                   |
| DESeq2                   | 0.1142       | 0.0454              | 0.1137             | 0.0452              | -          | -                   | -          | -                   |
| edgeR                    | 0.0653       | 0.0166              | 0.0642             | 0.0167              | -          | -                   | -          | -                   |
| LDM                      | 0.0515       | 0.0100              | 0.0515             | 0.0100              | 0.0515     | 0.0100              | 0.0498     | 0.0094              |
| limma                    | 0.0510       | 0.0107              | 0.0506             | 0.0106              | -          | -                   | -          | -                   |
| linear regression        | 0.0418       | 0.0067              | 0.0418             | 0.0067              | 0.0418     | 0.0067              | 0.0493     | 0.0096              |
| metagenomeSeq            | -            | -                   | -                  | -                   | -          | -                   | 0.1522     | 0.0686              |
| Monocle                  | 0.9480       | 0.9311              | 0.9472             | 0.9303              | 0.0450     | 0.0076              | 0.0520     | 0.0108              |
| QRank                    | 0.0486       | 0.0100              | 0.0490             | 0.0096              | 0.0495     | 0.0094              | 0.0488     | 0.0092              |
| ZINQ-MinP                | 0.0443       | 0.0079              | 0.0445             | 0.0077              | 0.0446     | 0.0078              | 0.0448     | 0.0076              |
| ZINQ-Cauchy              | 0.0487       | 0.0088              | 0.0489             | 0.0087              | 0.0490     | 0.0088              | 0.0492     | 0.0088              |
|                          | TPR          |                     |                    |                     |            |                     |            |                     |
| $\alpha$ -level          | 0.05         | 0.01                | 0.05               | 0.01                | 0.05       | 0.01                | 0.05       | 0.01                |
| corncob                  | 0.1102*      | 0.0366*             | 0.1102*            | 0.0365*             | -          | -                   | -          | -                   |
| DESeq2                   | 0.1454*      | 0.0624*             | 0.1451*            | 0.0623*             | -          | -                   | -          | -                   |
| edgeR                    | 0.0877*      | 0.0260*             | 0.0876*            | 0.0260*             | -          | -                   | -          | -                   |
| LDM                      | 0.0773       | 0.0192              | 0.0774             | 0.0192              | 0.0773     | 0.0192              | 0.1031     | 0.0321              |
| limma                    | 0.1046       | 0.0331              | 0.1052             | 0.0334              | -          | -                   | -          | -                   |
| linear regression        | 0.0651       | 0.0136 <sup>+</sup> | 0.0650             | 0.0136 <sup>+</sup> | 0.0651     | 0.0136 <sup>+</sup> | 0.1035     | 0.0320              |
| metagenomeSeq            | -            | -                   | -                  | -                   | -          | -                   | 0.1951*    | 0.0954*             |
| Monocle                  | 0.9507*      | 0.9356*             | 0.9505*            | 0.9348*             | 0.0700     | 0.0149 <sup>+</sup> | 0.1076     | 0.0343              |
| QRank                    | 0.0812       | 0.0212              | 0.0814             | 0.0208              | 0.0812     | 0.0211              | 0.0788     | 0.0202              |
| ZINQ-MinP                | 0.0760       | 0.0179 <sup>+</sup> | 0.0758             | 0.0176 <sup>+</sup> | 0.0759     | 0.0180 <sup>+</sup> | 0.0747     | 0.0170 <sup>+</sup> |
| ZINQ-Cauchy              | 0.0921       | 0.0235              | 0.0922             | 0.0234              | 0.0922     | 0.0235              | 0.0903     | 0.0226              |

\*: power of a method that inflates type I error

<sup>+</sup>: power of a method that deflates type I error



Table S16: Average FPR and TPR by unadjusted analysis on un-normalized/normalized simulated OTU tables with sample size 200 generated from the Dirichlet-Multinomial models fitted on CARDIA data, over 1000 runs according to significance cutoffs 0.05 and 0.01.

| <b>sample size = 200</b> |              |                     |                    |                     |            |                     |            |         |
|--------------------------|--------------|---------------------|--------------------|---------------------|------------|---------------------|------------|---------|
|                          | <i>Count</i> |                     | <i>Rarefaction</i> |                     | <i>TSS</i> |                     | <i>CSS</i> |         |
|                          | FPR          |                     |                    |                     |            |                     |            |         |
| $\alpha$ -level          | 0.05         | 0.01                | 0.05               | 0.01                | 0.05       | 0.01                | 0.05       | 0.01    |
| corncob                  | 0.0580       | 0.0144              | 0.0578             | 0.0145              | -          | -                   | -          | -       |
| DESeq2                   | 0.1030       | 0.0367              | 0.1030             | 0.0367              | -          | -                   | -          | -       |
| edgeR                    | 0.0605       | 0.0142              | 0.0608             | 0.0139              | -          | -                   | -          | -       |
| LDM                      | 0.0501       | 0.0101              | 0.0500             | 0.0101              | 0.0501     | 0.0101              | 0.0506     | 0.0101  |
| limma                    | 0.0507       | 0.0107              | 0.0503             | 0.0107              | -          | -                   | -          | -       |
| linear regression        | 0.0447       | 0.0077              | 0.0448             | 0.0076              | 0.0448     | 0.0077              | 0.0502     | 0.0104  |
| metagenomeSeq            | -            | -                   | -                  | -                   | -          | -                   | 0.1437     | 0.0622  |
| Monocle                  | 0.9467       | 0.9300              | 0.9459             | 0.9288              | 0.0468     | 0.0081              | 0.0517     | 0.0110  |
| QRank                    | 0.0502       | 0.0098              | 0.0496             | 0.0095              | 0.0501     | 0.0101              | 0.0493     | 0.0098  |
| ZINQ-MinP                | 0.0462       | 0.0090              | 0.0462             | 0.0090              | 0.0461     | 0.0090              | 0.0470     | 0.0091  |
| ZINQ-Cauchy              | 0.0516       | 0.0097              | 0.0515             | 0.0096              | 0.0519     | 0.0097              | 0.0515     | 0.0096  |
|                          | TPR          |                     |                    |                     |            |                     |            |         |
| $\alpha$ -level          | 0.05         | 0.01                | 0.05               | 0.01                | 0.05       | 0.01                | 0.05       | 0.01    |
| corncob                  | 0.1560       | 0.0601*             | 0.1558             | 0.0600*             | -          | -                   | -          | -       |
| DESeq2                   | 0.1572*      | 0.0664*             | 0.1570*            | 0.0665*             | -          | -                   | -          | -       |
| edgeR                    | 0.1023*      | 0.0321*             | 0.1021*            | 0.0319*             | -          | -                   | -          | -       |
| LDM                      | 0.0971       | 0.0295              | 0.0972             | 0.0295              | 0.0971     | 0.0295              | 0.1515     | 0.0594  |
| limma                    | 0.1562       | 0.0616              | 0.1563             | 0.0620              | -          | -                   | -          | -       |
| linear regression        | 0.0896       | 0.0243 <sup>+</sup> | 0.0895             | 0.0243 <sup>+</sup> | 0.0895     | 0.0243 <sup>+</sup> | 0.1544     | 0.0607  |
| metagenomeSeq            | -            | -                   | -                  | -                   | -          | -                   | 0.2263*    | 0.1175* |
| Monocle                  | 0.9531*      | 0.9387*             | 0.9526*            | 0.9377*             | 0.0921     | 0.0253              | 0.1573     | 0.0626  |
| QRank                    | 0.1176       | 0.0388              | 0.1171             | 0.0380              | 0.1178     | 0.0389              | 0.1135     | 0.0363  |
| ZINQ-MinP                | 0.1179       | 0.0389              | 0.1176             | 0.0387              | 0.1176     | 0.0388              | 0.1146     | 0.0371  |
| ZINQ-Cauchy              | 0.1432       | 0.0512              | 0.1428             | 0.0510              | 0.1431     | 0.0514              | 0.1393     | 0.0481  |

\*: power of a method that inflates type I error

<sup>+</sup>: power of a method that deflates type I error

Table S17: Computation time and memory cost to analyze normalized CARDIA data 10 times.

|                   | Rarefaction |            | CSS       |            |
|-------------------|-------------|------------|-----------|------------|
|                   | Time(min)   | Memory(GB) | Time(min) | Memory(GB) |
| corncob           | 84.5        | 2.0        | –         | –          |
| DESeq2            | 5.0         | 0.8        | –         | –          |
| edgeR             | 2.5         | 1.2        | –         | –          |
| LDM               | 7.5         | 2.1        | 16.5      | 2.1        |
| limma             | 1.0         | 1.7        | –         | –          |
| linear regression | 1.0         | 1.3        | 4.0       | 1.3        |
| metagenomeSeq     | –           | –          | 4.0       | 1.3        |
| Monocle           | 2.0         | 1.3        | 5.5       | 2.1        |
| QRank             | 4.0         | 1.3        | 4.0       | 1.3        |
| ZINQ-MinP         | 5.5         | 2.1        | 5.5       | 2.1        |
| ZINQ-Cauchy       | 4.5         | 1.3        | 4.5       | 1.3        |

Table S18: Distributions/models and normalization approaches for each comparison method.

| Model                       | Normalization Methods |        |     |     |     | Analysis Approaches               |                                         |
|-----------------------------|-----------------------|--------|-----|-----|-----|-----------------------------------|-----------------------------------------|
|                             | None <sup>a</sup>     | Rarefy | TSS | CSS | CLR | Single Taxon                      | OTU Table                               |
| Zero-inflated Poisson       | ✓                     | ✓      |     |     |     | ZIP regression                    | -                                       |
| Zero-inflated neg. binomial | ✓                     | ✓      |     |     |     | ZINB regression                   | -                                       |
| Negative binomial           | ✓                     | ✓      |     |     |     | -                                 | DESeq2<br>edgeR<br>Monocle <sup>b</sup> |
| Zero-inflated beta          |                       |        | ✓   |     |     | ZIB regression                    | -                                       |
| Beta-binomial               | ✓                     | ✓      |     |     |     | -                                 | Corncob                                 |
| Tobit                       |                       |        | ✓   | ✓   |     | Tobit regression                  | Monocle <sup>b</sup>                    |
| Zero-inflated lognormal     |                       |        | (✓) | ✓   |     | ZIlogN regression<br>(TSS or CSS) | metagenomeSeq<br>(CSS; no covariates)   |
| Lognormal                   | ✓                     | ✓      |     |     |     | -                                 | Limma                                   |
| Zero-inflated normal        |                       |        |     | ✓   | -   | metagenomeSeq                     | (covariates ok)                         |
| Zero-inflated gamma         |                       |        | ✓   | ✓   |     | ZIG regression                    | -                                       |
| Normal                      | ✓                     | ✓      | ✓   | ✓   | ✓   | Linear regression                 | Linear regression                       |
| Linear decomposition        | ✓                     | ✓      | ✓   | ✓   | ✓   | -                                 | LDM                                     |
| Quantile model              | ✓                     | ✓      | ✓   | ✓   | ✓   | ZINQ-MinP<br>ZINQ-Cauchy          | QRank<br>ZINQ-MinP<br>ZINQ-Cauchy       |

<sup>a</sup>: Original data (normalization = “none”) was considered only for OTU table analysis

<sup>b</sup>: Monocle model depends on normalization method
